# Supplementary material
Source: publisher figshare collection journal article supplement (https://frontiersin.figshare.com/ndownloader/files/23084129)
Supplement: Supplementary file 1 [file 23084129]

| **Supplementary Table 1: The list containing all the species of wild edible plants from India** | | |
| --- | --- | --- |
| *Abelmoschus angulosus* | *Diospyros melanoxylon* | *Persicaria glabra* |
| *Abelmoschus crinitus* | *Diospyros montana* | *Persicaria nepalensis* |
| *Abelmoschus manihot* | *Diospyros sylvatica* | *Persicaria orientalis* |
| *Abelmoschus moschatus* | *Diospyros vera* | *Phlogacanthus curviflorus* |
| *Abroma augusta* | *Diplazium esculentum* | *Phoenix acaulis* |
| *Abrus precatorius* | *Diplocyclos palmatus* | *Phoenix loureiroi* |
| *Abutilon indicum* | *Diploknema butyracea* | *Phoenix pusilla* |
| *Acacia catechu* | *Dipsacus inermis* | *Phragmites karka* |
| *Acacia dealbata* | *Disporum cantoniense* | *Phyllanthus acidus* |
| *Acacia farnesiana* | *Docynia indica* | *Phyllanthus* *amarus* |
| *Acacia modesta* | *Dodecadenia grandiflora* | *Phyllanthus emblica* |
| *Acacia nilotica* | *Dolichos trilobatus* | *Phyllanthus fraternus* |
| *Acacia pennata* | *Dolichos trilobus* | *Phyllanthus reticulatus* |
| *Acacia sinuata* | *Dregea volubilis* | *Phyllanthus urinaria* |
| *Acalypha indica* | *Drimia indica* | *Phyllanthus virgatus* |
| *Achyranthes aspera* | *Drymaria cordata* | *Phyllostachys bambusoides* |
| *Achyranthes bidentata* | *Drynaria quercifolia* | *Phyllostachys mannii* |
| *Acmella oleracea* | *Drynaria quercifolia* | *Physalis angulata* |
| *Acmella paniculata* | *Dryopteris cochleata* | *Physalis divaricata* |
| *Acorus calamus* | *Dryopteris cucullata* | *Physalis minima* |
| *Actinidia callosa* | *Dryopteris marginata* | *Physalis peruviana* |
| *Actinoscirpus grossus* | *Drypetes assamica* | *Phytolacca acinosa* |
| *Adenanthera pavonina* | *Drypetes sepiaria* | *Picris hieracioides* |
| *Adenia hondala* | *Duabanga grandiflora* | *Pilea bracteosa* |
| *Adiantum* *capillus-veneris* | *Duchesnea indica* | *Pinanga gracilis* |
| *Aerva lanata* | *Dysoxylum excelsum* | *Pinus gerardiana* |
| *Aerva sanguinolenta* | *Dysphania ambrosioides* | *Pinus roxburghii* |
| *Aeschynomene aspera* | *Dysphania botrys* | *Piper mullesua* |
| *Aesculus indica* | *Echinochloa colona* | *Piper pedicellatum* |
| *Aganope thyrsiflora* | *Echinochloa frumentacea* | *Piper sylvaticum* |
| *Agaricus campestris* | *Echinochloa stagnina* | *Piper thomsonii* |
| *Agave americana* | *Echinops cornigerus* | *Pistacia chinensis* |
| *Agave vivipara* | *Eclipta prostrata* | *Pistia stratiotes* |
| *Ageratina adenophora* | *Ehretia acuminata* | *Pithecellobium dulce* |
| *Ageratum conyzoides* | *Ehretia laevis* | *Plantago asiatica* |
| *Aglaia edulis* | *Ehretia microphylla* | *Plantago depressa* |
| *Aglaia perviridis* | *Elaeagnus angustifolia* | *Plantago himalaica* |
| *Aglaia roxburghiana* | *Elaeagnus caudata* | *Plantago lanceolata* |
| *Aglaonema hookerianum* | *Elaeagnus conferta* | *Plantago major* |
| *Alangium salvifolium* | *Elaeagnus indica* | *Plectocomia assamica* |
| *Albizia myriophylla* | *Elaeagnus latifolia* | *Plectranthus amboinicus* |
| *Albizia odoratissima* | *Elaeagnus parvifolia* | *Pleurotus citrinopileatus* |
| *Albizia procera* | *Elaeagnus pyriformis* | *Pleurotus ostreatus* |
| *Albizia saman* | *Elaeagnus rhamnoides* | *Pleurotus pulmonarius* |
| *Alisma plantago-aquatica* | *Elaeagnus umbellata* | *Poa annua* |
| *Allamanda cathartica* | *Elaeocarpus floribundus* | *Podophyllum hexandrum* |
| *Allantodia aspera* | *Elaeocarpus lanceifolius* | *Pogostemon benghalensis* |
| *Allium ampeloprasum* | *Elaeocarpus prunifolius* | *Pogostemon elsholtzioides* |
| *Allium ascalonicum* | *Elaeocarpus serratus* | *Pogostemon purpurascens* |
| *Allium atropurpureum* | *Elaeocarpus sikkimensis* | *Poikilospermum suaveolens* |
| *Allium carolinianum* | *Elaeocarpus tectorius* | *Polyalthia cerasoides* |
| *Allium cepa* | *Elaeocarpus tuberculatus* | *Polyalthia suberosa* |
| *Allium chinense* | *Elatostema lineolatum* | *Polygonatum cirrhifolium* |
| *Allium hookeri* | *Elatostema platyphyllum* | *Polygonatum multiflorum* |
| *Allium humile* | *Elatostema sessile* | *Polygonatum verticillatum* |
| *Allium jacquemontii* | *Eleocharis dulcis* | *Polygonum* *aviculare* |
| *Allium przewalskianum* | *Elephantopus scaber* | *Polygonum kawagoeanum* |
| *Allium schoenoprasum* | *Elsholtzia blanda* | *Polygonum microcephalum* |
| *Allium semenovii* | *Elsholtzia densa* | *Polygonum molle* |
| *Allium stracheyi* | *Elsholtzia flava* | *Polygonum perfoliatum* |
| *Allium tuberosum* | *Embelia ribes* | *Polygonum plebeium* |
| *Allium wallichii* | *Embelia sessiliflora* | *Polygonum posumbu* |
| *Allmania nodiflora* | *Embelia subcoriacea* | *Polygonum praetermissum* |
| *Allophylus serratus* | *Embelia tsjeriam-cottam* | *Polygonum runcinatum* |
| *Alocasia acuminata* | *Embelia vestita* | *Pongamia pinnata* |
| *Alocasia cucullata* | *Emilia sonchifolia* | *Portulaca oleracea* |
| *Alocasia fallax* | *Enicostema axillare* | *Portulaca quadrifida* |
| *Alocasia fornicata* | *Ensete superbum* | *Potentilla atrosanguinea* |
| *Alocasia macrorrhizos* | *Entada gigas* | *Potentilla nepalensis* |
| *Alocasia macrorrhizos* | *Entada rheedii* | *Potentilla supina* |
| *Alocasia odora* | *Enydra fluctuans* | *Pothos chinensis* |
| *Aloe vera* | *Ephedra gerardiana* | *Pothos scandens* |
| *Alpinia galanga* | *Erechtites valerianifolia* | *Pouzolzia hirta* |
| *Alpinia malaccensis* | *Eremocaulon capitatum* | *Pouzolzia zeylanica* |
| *Alpinia nigra* | *Eremurus himalaicus* | *Premna corymbosa* |
| *Alpinia officinarum* | *Erigeron trilobus* | *Premna herbacea* |
| *Alstonia scholaris* | *Eriolobus trilobatus* | *Premna mollissima* |
| *Alternanthera bettzickiana* | *Eriosema chinense* | *Prinsepia utilis* |
| *Alternanthera brasiliana* | *Eryngium foetidum* | *Prosopis cineraria* |
| *Alternanthera ficoidea* | *Erythrina stricta* | *Prosopis juliflora* |
| *Alternanthera paronychioides* | *Erythrina suberosa* | *Protium serratum* |
| *Alternanthera philoxeroides* | *Erythrina variegata* | *Prunus armeniaca* |
| *Alternanthera pungens* | *Erythroxylum monogynum* | *Prunus bracteopadus* |
| *Alternanthera sessilis* | *Etlingera linguiformis* | *Prunus cerasoides* |
| *Alysicarpus longifolius* | [*Etlingera loroglossa*](http://www.theplantlist.org/tpl1.1/record/kew-244719) | *Prunus cornuta* |
| *Alysicarpus rugosus* | *Eugenia cotinifolia* | *Prunus domestica* |
| *Amaranthus blitum* | *Eugenia involucrata* | *Prunus jacquemontii* |
| *Amaranthus caudatus* | *Eugenia roxburghii* | *Prunus jenkinsii* |
| *Amaranthus cruentus* | *Eulophia herbacea* | *Prunus napaulensis* |
| *Amaranthus graecizans* | *Eulophia spectabilis* | *Prunus persica* |
| *Amaranthus hybridus* | *Euphorbia elegans* | *Prunus venosa* |
| *Amaranthus polygamus* | *Euphorbia granulata* | *Psilanthus wightianus* |
| *Amaranthus polygonoides* | *Euphorbia heterophylla* | *Psydrax dicoccos* |
| *Amaranthus roxburghianus* | *Euphorbia hirta* | *Pteridium aquilinum* |
| *Amaranthus spinosus* | *Euphorbia prostrata* | *Pteris ensiformis* |
| *Amaranthus tricolor* | *Euphorbia royleana* | *Pterocarpus marsupium* |
| *Amaranthus viridis* | *Eurya acuminata* | *Pterygota alata* |
| *Amomum aromaticum* | *Euryale ferox* | *Pueraria montana* |
| *Amomum dealbatum* | *Exbucklandia populnea* | *Pueraria phaseoloides* |
| *Amomum maximum* | *Fagopyrum acutatum* | *Pueraria tuberosa* |
| *Amorphophallus bulbifer* | *Fagopyrum esculentum* | *Pupalia lappacea* |
| *Amorphophallus commutatus* | *Ferula jaeschkeana* | *Pyracantha crenulata* |
| *Amorphophallus margaritifer* | *Ficus auriculata* | *Pyrularia edulis* |
| *Amorphophallus paeoniifolius* | *Ficus benghalensis* | *Pyrus bourgaeana* |
| *Amorphophallus sylvaticus* | *Ficus benjamina* | *Pyrus calleryana* |
| *Ampelocissus divaricata* | *Ficus carica* | *Pyrus pashia* |
| *Ampelocissus latifolia* | *Ficus exasperata* | *Quercus griffithii* |
| *Ampelocissus rugosa* | *Ficus geniculata* | *Quercus lanata* |
| *Ampelocissus tomentosa* | *Ficus hederacea* | *Quercus robur* |
| *Andrographis paniculata* | *Ficus hirta* | *Quercus semecarpifolia* |
| *Anethum graveolens* | *Ficus hispida* | *Radermachera xylocarpa* |
| *Anethum graveolens* | *Ficus hookeriana* | *Ranunculus sceleratus* |
| *Anethum sowa* | *Ficus lacor* | *Remusatia pumila* |
| *Angelica archangelica* | *Ficus macrophylla* | *Remusatia vivipara* |
| *Angelica glauca* | *Ficus microcarpa* | *Rhamnus napalensis* |
| *Angiopteris evecta* | *Ficus neriifolia* | *Rhamnus persica* |
| *Anisomeles indica* | *Ficus nervosa* | *Rhamnus triquetra* |
| *Annona reticulata* | *Ficus palmata* | *Rheum australe* |
| *Annona squamosa* | *Ficus pumila* | *Rheum webbianum* |
| *Anogeissus latifolia* | *Ficus punctata* | *Rhodiola heterodonta* |
| *Anredera cordifolia* | *Ficus racemosa* | *Rhodiola imbricata* |
| *Antidesma acidum* | *Ficus religiosa* | *Rhodiola* *tibetica* |
| *Antidesma bunius* | *Ficus retusa* | *Rhododendron arboreum* |
| *Antidesma ghaesembilla* | *Ficus rumphii* | *Rhodomyrtus tomentosa* |
| *Antidesma khasianum* | *Ficus semicordata* | *Rhopalephora scaberrima* |
| *Antidesma montanum* | *Ficus subincisa* | *Rhus chinensis* |
| *Antigonon leptopus* | *Ficus tsjakela* | *Rhus succedanea* |
| *Aponogeton appendiculatus* | *Firmiana simplex* | *Rhynchosia cana* |
| *Aponogeton crispus* | *Fissistigma polyanthum* | *Rhynchosia filipes* |
| *Aponogeton natans* | *Fissistigma verrucosum* | *Rhynchosia rufescens* |
| *Aponogeton undulatus* | *Flacourtia indica* | *Rhynchosia suaveolens* |
| *Aporosa acuminata* | *Flacourtia jangomas* | *Rhynchotechum ellipticum* |
| *Aporosa cardiosperma* | *Flacourtia montana* | *Ribes alpestre* |
| *Aporosa octandra* | *Flemingia procumbens* | *Ribes glaciale* |
| *Aralia armata* | *Flueggea leucopyrus* | *Ribes orientale* |
| *Aralia leschenaultii* | *Flueggea virosa* | *Rivea hypocrateriformis* |
| *Ardisia macrocarpa* | *Fragaria nilgerrensis* | *Rorippa indica* |
| *Ardisia paniculata* | *Fragaria nubicola* | *Rosa macrophylla* |
| *Ardisia polycephala* | *Fragaria vesca* | *Rosa moschata* |
| *Ardisia solanacea* | *Fritillaria* *cirrhosa* | *Rosa sericea* |
| *Ardisia thrysiflora* | *Garcinia cowa* | *Rosa webbiana* |
| *Arenga wightii* | *Garcinia elliptica* | *Rotheca serrata* |
| *Argemone mexicana* | *Garcinia gummi-gutta* | *Rourea minor* |
| *Arisaema flavum* | *Garcinia kydia* | *Rubia cordifolia* |
| *Arisaema jacquemontii* | *Garcinia lanceifolia* | *Rubia manjith* |
| *Arisaema leschenaultii* | *Garcinia morella* | *Rubus acuminatus* |
| *Arisaema murrayi* | *Garcinia pedunculata* | *Rubus alceifolius* |
| *Arisaema tortuosum* | *Garcinia sopsopia* | *Rubus barberi* |
| *Arisaema utile* | *Garcinia spicata* | *Rubus biflorus* |
| *Arnebia euchroma* | *Garcinia xanthochymus* | *Rubus buergeri* |
| *Artabotrys hexapetalus* | *Gardenia gummifera* | *Rubus dasycoccus* |
| *Artemisia indica* | *Gardenia jasminoides* | *Rubus ellipticus* |
| *Artemisia nilagirica* | *Gardenia latifolia* | *Rubus fasciculatus* |
| *Artemisia nilagirica* | *Gardenia latifolia* | *Rubus lineatus* |
| *Artemisia scoparia* | *Gardenia resinifera* | *Rubus lucens* |
| *Artocarpus chama* | *Garuga pinnata* | *Rubus macilenthus* |
| *Artocarpus gomezianus* | *Gaultheria fragrantissima* | *Rubus niveus* |
| *Artocarpus heterophyllus* | *Gigantochloa nigrociliata* | *Rubus paniculatus* |
| *Artocarpus hirsutus* | *Gigantochloa parvifolia* | *Rubus pentagonus* |
| *Artocarpus integer* | *Gigantochloa rostrata* | *Rubus rosifolius* |
| *Artocarpus lacucha* | *Girardinia diversifolia* | *Rubus* *ulmifolius* |
| *Arundo donax* | *Girardinia palmata* | *Rumex* *acetosa* |
| *Asparagus racemosus* | *Gisekia pharnaceoides* | *Rumex dentatus* |
| *Asphodelus tenuifolius* | *Givotia moluccana* | *Rumex hastatus* |
| *Astrocasia jacobinensis* | *Glinus oppositifolius* | *Rumex maritimus* |
| *Asystasia gangetica* | *Gliricidia sepium* | *Rumex nepalensis* |
| *Atalantia racemosa* | *Globba clarkei* | *Rumex vesicarius* |
| *Atriplex hortensis* | *Globba marantina* | *Rungia pectinata* |
| *Auricularia delicata* | *Globba racemosa* | *Saccharum narenga* |
| *Auricularia polytricha* | *Gloriosa superba* | *Saccharum rufipilum* |
| *Avena fatua* | *Glycosmis pentaphylla* | *Saccharum spontaneum* |
| *Averrhoa bilimbi* | *Glycyrrhiza glabra* | *Sacciolepis interrupta* |
| *Averrhoa carambola* | *Gmelina arborea* | *Sagittaria sagittifolia* |
| *Azadirachta indica* | *Gnaphalium pensylvanicum* | *Salicornia europaea* |
| *Baccaurea courtallensis* | *Gnaphalium purpureum* | *Sambucus javanica* |
| *Baccaurea ramiflora* | *Gnetum gnemon* | *Santalum album* |
| *Bacopa monnieri* | *Gnetum montanum* | *Sapindus emarginatus* |
| *Balanites aegyptiaca* | *Gomphogyne cissiformis* | *Sapindus mukorossi* |
| *Bambusa balcooa* | *Gonostegia hirta* | *Saraca asoca* |
| *Bambusa bambos* | *Graptophyllum pictum* | *Sarcochlamys pulcherrima* |
| *Bambusa pallida* | *Grewia abutilifolia* | *Sarcostemma acidum* |
| *Bambusa polymorpha* | *Grewia asiatica* | *Saurauia napaulensis* |
| *Bambusa tulda* | *Grewia bracteata* | *Sauropus androgynus* |
| *Bambusa tulda* | *Grewia damine* | *Saussurea gossypiphora* |
| *Bambusa vulgaris* | *Grewia eriocarpa* | *Schima wallichii* |
| *Barleria cristata* | *Grewia flavescens* | *Schisandra grandiflora* |
| *Basella alba* | *Grewia heterotricha* | *Schizostachyum dullooa* |
| *Bassia eriophora* | *Grewia hirsuta* | *Schleichera oleosa* |
| *Bauhinia acuminata* | *Grewia laevigata* | *Schleichera trijuga* |
| *Bauhinia divaricata* | *Grewia oppositifolia* | *Schoenoplectus lacustris* |
| *Bauhinia malabarica* | *Grewia optiva* | *Scoparia dulcis* |
| *Bauhinia purpurea* | *Grewia rothii* | *Scutia myrtina* |
| *Bauhinia racemosa* | *Grewia sapida* | *Secamone emetica* |
| *Bauhinia semla* | *Grewia sclerophylla* | *Sechium edule* |
| *Bauhinia vahlii* | *Grewia tiliifolia* | *Sedum* *ewersii* |
| *Bauhinia variegata* | *Grewia villosa* | *Selaginella wallichii* |
| *Begonia floccifera* | *Gymnema sylvestre* | *Senna alata* |
| *Begonia griffithiana* | *Gymnopetalum chinense* | *Senna hirsuta* |
| *Begonia josephi* | *Gynura cusimbua* | *Senna obtusifolia* |
| *Begonia malabarica* | *Habenaria plantaginea* | *Senna occidentalis* |
| *Begonia obversa* | *Hedera nepalensis* | *Senna septemtrionalis* |
| *Begonia palmata* | *Hedychium coccineum* | *Senna siamea* |
| *Begonia picta* | *Hedychium coronarium* | *Senna sophera* |
| *Begonia roxburghii* | *Hedyotis pruinosa* | *Senna tora* |
| *Begonia thomsonii* | *Hedyotis scandens* | *Senna uniflora* |
| *Benincasa hispida* | *Helichrysum indicum* | *Sesbania grandiflora* |
| *Benkara malabarica* | *Helichrysum luteoalbum* | *Sesbania sesban* |
| *Berberis aristata* | *Helicteres isora* | *Seseli* *libanotis* |
| *Berberis asiatica* | *Heliotropium indicum* | *Shorea robusta* |
| *Berberis chitria* | *Helixanthera ligustrina* | *Sida acuta* |
| *Berberis lycium* | *Helminthostachys zeylanica* | *Sida cordata* |
| *Berberis petiolaris* | *Hemidesmus indicus* | *Sinopodophyllum* *hexandrum* |
| *Berberis tinctoria* | *Heracleum candicans* | *Sloanea tomentosa* |
| *Bergenia ciliata* | *Hibiscus aculeatus* | *Smilax aspera* |
| *Bergenia pacumbis* | *Hibiscus cannabinus* | *Smilax china* |
| *Bidens biternata* | *Hibiscus dongolensis* | *Smilax glabra* |
| *Bidens pilosa* | *Hibiscus hispidissimus* | *Smilax ovalifolia* |
| *Bischofia javanica* | *Hibiscus lobatus* | *Smilax perfoliata* |
| *Blepharis maderaspatensis* | *Hibiscus micranthus* | *Smilax zeylanica* |
| *Blumea barbata* | *Hibiscus sabdariffa* | *Smithia conferta* |
| *Blumea fistulosa* | *Hibiscus surattensis* | *Solanum aethiopicum* |
| *Blumea lacera* | *Himalayacalamus hookerianus* | *Solanum americanum* |
| *Blumea lanceolaria* | *Himalrandia tetrasperma* | *Solanum anguivi* |
| *Blumea lanciniata* | *Hippophae salicifolia* | *Solanum barbisetum* |
| [*Boehmeria glomerulifera*](http://www.theplantlist.org/tpl1.1/record/kew-2678251) | *Hippophae tibetana* | *Solanum betaceum* |
| *Boehmeria macrophylla* | *Hodgsonia macrocarpa* | *Solanum erianthum* |
| *Boerhavia chinensis* | *Holarrhena pubescens* | *Solanum incanum* |
| *Boerhavia diffusa* | *Holboellia latifolia* | *Solanum myriacanthum* |
| *Boerhavia erecta* | *Holostemma ada-kodien* | *Solanum nigrum* |
| *Boerhavia repanda* | *Homalomena aromatica* | *Solanum pimpinellifolium* |
| *Bolboschoenus glaucus* | *Homonoia riparia* | *Solanum rudepannum* |
| *Boletus edulis* | *Hornungia procumbens* | *Solanum sisymbriifolium* |
| *Bombax ceiba* | *Horsfieldia amygdalina* | *Solanum spirale* |
| *Borassus flabellifer* | *Horsfieldia kingii* | *Solanum surattense* |
| Boswellia serrata | *Houttuynia cordata* | *Solanum torvum* |
| *Brassaiopsis hainla* | *Hovenia dulcis* | *Solanum viarum* |
| *Bridelia montana* | *Hybanthus enneaspermus* | *Solanum villosum* |
| *Bridelia retusa* | *Hydrangea robusta* | *Solanum violaceum* |
| *Bridelia stipularis* | *Hydrocotyle javanica* | *Solanum virginianum* |
| *Brucea javanica* | *Hydrocotyle sibthorpioides* | *Solena amplexicaulis* |
| *Bryophyllum pinnatum* | *Hydrolea zeylanica* | *Sonchus asper* |
| *Buchanania axillaris* | *Hygrophila auriculata* | *Sonchus brachyotus* |
| *Buchanania cochinchinensis* | *Hymenodictyon orixense* | *Sonchus oleraceus* |
| *Buddleja asiatica* | *Hypericum japonicum* | *Sonchus wightianus* |
| *Bunium persicum* | *Hypoxis aurea* | *Sonneratia apetala* |
| *Bupleurum wightii* | *Hyptis suaveolens* | *Sonneratia caseolaris* |
| *Butea monosperma* | *Impatiens annulifer* | *Sorbus aucuparia* |
| *Butea superba* | *Impatiens balsamina* | *Sorbus cuspidata* |
| *Butomopsis latifolia* | *Impatiens glandulifera* | *Sorghum halepense* |
| *Caesalpinia pulcherrima* | *Impatiens racemosa* | *Spergula arvensis* |
| *Cajanus* *crassus* | *Indigofera cassioides* | *Spermacoce articularis* |
| *Cajanus scarabaeoides* | *Indigofera glandulosa* | *Sphaeranthus indicus* |
| *Calamus erectus* | *Indigofera hirsuta* | *Spilanthes acmella* |
| *Calamus flagellum* | *Iphigenia indica* | *Spinacia oleracea* |
| *Calamus floribundus* | *Ipomoea alba* | *Spiradiclis bifida* |
| *Calamus latifolius* | *Ipomoea aquatica* | *Spondias pinnata* |
| *Calamus rotang* | *Ipomoea carnea* | *Stachyphrynium placentarium* |
| *Calamus tenuis* | *Ipomoea marginata* | *Stellaria media* |
| *Callicarpa arborea* | *Ipomoea mauritiana* | *Stemona tuberosa* |
| *Callicarpa macrophylla* | *Ipomoea nil* | *Stenochlaena palustris* |
| *Callicarpa rubella* | *Ipomoea quamoclit* | *Sterculia foetida* |
| *Callicarpa vestita* | *Ipomoea sumatrana* | *Sterculia lanceifolia* |
| *Canarium strictum* | *Isodon ternifolius* | *Sterculia villosa* |
| *Canavalia cathartica* | *Ixora coccinea* | *Stixis suaveolens* |
| *Canavalia ensiformis* | *Ixora microphylla* | *Streblus asper* |
| *Canavalia gladiata* | *Ixora undulata* | *Streblus indicus* |
| *Canavalia mollis* | *Jasminum auriculatum* | *Strobilanthes helicta* |
| *Canna indica* | *Jasminum calophyllum* | *Strychnos nux-vomica* |
| *Cannabis sativa* | *Jasminum trichotomum* | *Strychnos potatorum* |
| *Cantharellus cibarius* | *Jatropha multifida* | *Suaeda vermiculata* |
| *Canthium coromandelicum* | *Juglans regia* | *Suregada multiflora* |
| *Capparis brevispina* | *Justicia adhatoda* | *Syzygium acuminatum* |
| *Capparis decidua* | *Justicia nilgherrensis* | *Syzygium calophyllifolium* |
| *Capparis himalayensis* | *Kaempferia galanga* | *Syzygium claviflorum* |
| *Capparis sepiaria* | *Laccaria lateritia* | *Syzygium densiflorum* |
| *Capparis spinosa* | *Lactarius volemus* | *Syzygium formosum* |
| *Capparis zeylanica* | *Lactuca brunoniana* | *Syzygium fruticosum* |
| *Capsella bursa-pastoris* | *Lactuca dolichophylla* | *Syzygium kurzii* |
| *Carallia brachiata* | *Lactuca serriola* | *Syzygium malaccense* |
| *Caralluma adscendens* | *Lantana camara* | *Syzygium mundagam* |
| *Caralluma tuberculata* | *Lantana indica* | *Syzygium nervosum* |
| *Caralluma umbellata* | *Laphangium luteoalbum* | *Syzygium praecox* |
| *Cardamine hirsuta* | *Laportea interrupta* | *Syzygium praetermissum* |
| *Cardamine impatiens* | *Lasia spinosa* | *Syzygium salicifolium* |
| *Cardiospermum halicacabum* | *Lasianthus japonicus* | *Syzygium tetragonum* |
| *Careya arborea* | *Launaea procumbens* | *Syzygium venosum* |
| *Carissa carandas* | *Leea asiatica* | *Tacca leontopetaloides* |
| *Carissa spinarum* | *Leea indica* | *Tadehagi triquetrum* |
| *Carthamus oxyacantha* | *Leea macrophylla* | *Tagetes erecta* |
| *Carthamus tinctorius* | *Lentinula edodes* | *Tagetes minuta* |
| *Carum carvi* | *Lentinus squarrosulus* | *Talinum fruticosum* |
| *Caryota urens* | *Lepidium latifolium* | *Talinum portulacifolium* |
| *Casearia esculenta* | *Lepidium sativum* | *Tamarindus indica* |
| *Casearia glomerata* | *Lepionurus sylvestris* | *Tamilnadia uliginosa* |
| *Casearia graveolens* | *Lepisanthes rubiginosa* | *Taraxacum campylodes* |
| *Casearia tomentosa* | *Lepisanthes senegalensis* | *Tarenna asiatica* |
| *Cassia fistula* | *Leucaena leucocephala* | *Taxillus vestitus* |
| *Cassia occidentalis* | *Leucas aspera* | *Taxus baccata* |
| *Cassia siamea* | *Leucas cephalotes* | *Telosma pallida* |
| *Castanea sativa* | *Leucas montana* | *Tephrosia candida* |
| *Castanopisis tribuloides* | *Leucas stricta* | *Tephrosia purpurea* |
| *Castanopsis armata* | *Leucas zeylanica* | *Teramnus labialis* |
| *Castanopsis hystrix* | *Leucosceptrum canum* | *Terminalia arjuna* |
| *Castanopsis indica* | *Limnophila indica* | *Terminalia bellirica* |
| *Castanopsis purpurella* | *Limnophila rugosa* | *Terminalia catappa* |
| *Catunaregam nilotica* | *Limonia acidissima* | *Terminalia chebula* |
| *Catunaregam spinosa* | *Linum perenne* | *Terminalia citrina* |
| *Cayratia japonica* | *Lippia alba* | *Tetrastigma lanceolarium* |
| *Cayratia* trifolia | *Lippia javanica* | *Tetrastigma leucostaphylum* |
| *Celastrus paniculatus* | *Litsea cubeba* | *Tetrastigma pedunculare* |
| *Celosia argentea* | *Litsea glutinosa* | *Tetrastigma rumicispermum* |
| *Celosia polygonoides* | *Livistona jenkinsiana* | *Tetrastigma serrulatum* |
| *Celtis australis* | *Lonicera angustifolia* | *Themeda triandra* |
| *Celtis philippensis* | *Lonicera quinquelocularis* | *Thespesia populnea* |
| *Celtis timorensis* | *Lonicera webbiana* | *Thunbergia alata* |
| *Centaurea iberica* | *Ludwigia adscendens* | *Thunbergia grandiflora* |
| *Centella asiatica* | *Ludwigia octovalvis* | *Thymus linearis* |
| *Centipeda minima* | *Ludwigia prostrata* | *Thysanolaena latifolia* |
| *Cephalostachyum capitatum* | *Luffa operculata* | *Tinospora sinensis* |
| *Ceratopteris thalictroides* | *Lycianthes laevis* | *Toddalia asiatica* |
| *Ceriscoides campanulata* | *Lygodium flexuosum* | *Toxicodendron griffithii* |
| *Ceriscoides turgida* | *Lygodium microphyllum* | *Toxicodendron hookeri* |
| *Ceropegia bulbosa* | *Lyonia ovalifolia* | *Tragopogon gracilis* |
| *Ceropegia candelabrum* | *Maclura cochinchinensis* | *Trapa natans* |
| *Ceropegia fantastica* | *Macrothelypteris ornata* | *Trema orientalis* |
| *Ceropegia hirsuta* | *Madhuca longifolia* | *Trema politoria* |
| *Ceropegia metziana* | *Madhuca neriifolia* | *Trevesia palmata* |
| *Ceropegia tuberosa* | *Maesa chisia* | *Trianthema portulacastrum* |
| *Chaerophyllum villosum* | *Maesa indica* | *Tribulus terrestris* |
| *Chamaecrista absus* | *Maesa indica* | *Trichodesma nudiflora* |
| *Chamaerops humilis* | *Maesa montana* | *Trichosanthes cucumerina* |
| *Cheilocostus speciosus* | *Magnolia champaca* | *Trichosanthes tricuspidata* |
| *Chenopodium album* | *Magnolia oblonga* | *Tridax procumbens* |
| *Chenopodium foliosum* | *Mahonia borealis* | *Trigonella emodi* |
| *Chenopodium giganteum* | *Mahonia napaulensis* | *Trigonella foenum-graecum* |
| *Chimonobambusa callosa* | *Maianthemum purpureum* | *Trifolium* *repens* |
| *Chimonocalamus griffithianus* | *Mallotus philippensis* | *Triglochin* *palustris* |
| *Chlorophytum arundinaceum* | *Mallotus repandus* | *Tulipa clusiana* |
| *Chlorophytum borivilianum* | *Malus baccata* | *Turbinellus floccosus* |
| *Chlorophytum laxum* | *Malva neglecta* | *Typha domingensis* |
| *Chlorophytum tuberosum* | *Malva parviflora* | *Typha elephantina* |
| *Chloroxylon swietenia* | *Malva pusilla* | *Typhonium trilobatum* |
| *Choerospondias axillaris* | *Malva sylvestris* | *Uraria rufescens* |
| *Chonemorpha fragrans* | *Malva verticillata* | *Urtica ardens* |
| *Chromolaena odorata* | *Mangifera sylvatica* | *Urtica dioica* |
| *Chrysophyllum flexuosum* | *Manilkara hexandra* | *Urtica hyperborea* |
| *Chrysophyllum roxburghii* | *Manilkara zapota* | *Urtica parviflora* |
| *Cicer microphyllum* | *Maranta arundinacea* | *Ustilago consimilis* |
| *Cicer* *songaricum* | *Marsdenia tenacissima* | *Uvaria hamiltonii* |
| *Cichorium intybus* | *Marsilea minuta* | *Uvaria rufa* |
| *Codonopsis ovata* | *Marsilea quadrifolia* | *Vaccaria hispanica* |
| *Cinnamomum bejolghota* | *Marsilea vestita* | *Vaccinium mandarinorum* |
| *Cinnamomum malabatrum* | *Martynia annua* | *Vallisneria natans* |
| *Cinnamomum tamala* | *Maytenus rufa* | *Vanda tessellata* |
| *Cirsium wallichii* | *Medicago lupulina* | *Ventilago* *denticulata* |
| *Cissampelos pareira* | *Medinilla rubicunda* | *Ventilago maderaspatana* |
| *Cissus adnata* | *Megacarpaea polyandra* | *Verbascum thapsus* |
| *Cissus javana* | *Melia azedarach* | *Viburnum corylifolium* |
| *Cissus quinquangularis* | *Melilotus officinalis* | *Viburnum cotinifolium* |
| *Cissus repanda* | *Meliosma pinnata* | *Viburnum erubescens* |
| *Cissus repens* | *Meliosma simplicifolia* | *Viburnum foetidum* |
| *Citrus hystrix* | *Melocalamus compactiflorus* | *Viburnum grandiflorum* |
| *Citrus latipes* | *Melocalamus indicus* | *Viburnum mullaha* |
| *Citrus limon* | *Melocanna baccifera* | *Viburnum nervosum* |
| *Citrus maxima* | *Melochia corchorifolia* | *Viburnum odoratissimum* |
| *Citrus medica* | *Mentha × piperita* | *Vicia hirsuta* |
| *Citrus sinensis* | *Mentha arvensis* | *Vigna aconitifolia* |
| *Clausena dentata* | *Mentha longifolia* | *Vigna trilobata* |
| *Clausena excavata* | *Mentha spicata* | *Viola arcuata* |
| *Clausena heptaphylla* | *Meriandra dianthera* | *Viola pilosa* |
| *Clematis hedysarifolia* | *Meriandra strobilifera* | *Viscum album* |
| *Cleome chelidonii* | *Merremia emarginata* | *Vitis flexuosa* |
| *Cleome gynandra* | *Merremia macrocalyx* | *Vitis heyneana* |
| *Cleome monophylla* | *Merremia umbellata* | *Wallichia oblongifolia* |
| *Cleome viscosa* | *Merremia vitifolia* | *Waltheria indica* |
| *Clerodendrum glandulosum* | *Mesua ferrea* | *Wendlandia glabrata* |
| *Clerodendrum indicum* | *Meyna pubescens* | *Wendlandia paniculata* |
| *Clerodendrum infortunatum* | *Meyna spinosa* | *Willughbeia edulis* |
| *Clitoria ternatea* | *Mikania micrantha* | *Wolffia globosa* |
| *Cocculus hirsutus* | *Miliusa velutina* | *Woodfordia fruticosa* |
| *Cochlospermum religiosum* | *Mimosa himalayana* | *Wrightia arborea* |
| *Coix lacryma-jobi* | *Mimosa imbricata* | *Wrightia tinctoria* |
| *Coleus forskohlii* | *Mimosa pudica* | *Xanthium strumarium* |
| *Colocasia antiquorum* | *Mimusops elengi* | *Xanthosoma sagittifolium* |
| *Colocasia esculenta* | *Mirabilis jalapa* | *Ximenia americana* |
| *Combretum decandrum* | *Miscanthus sinensis* | *Xylia xylocarpa* |
| *Combretum nanum* | *Molineria trichocarpa* | *Youngia japonica* |
| *Commelina benghalensis* | *Mollugo pentaphylla* | *Zaleya decandra* |
| *Commelina diffusa* | *Momordica balsamina* | *Zanthoxylum acanthopodium* |
| *Commelina ensifolia* | *Momordica cochinchinensis* | *Zanthoxylum armatum* |
| *Commelina erecta* | *Momordica cymbalaria* | *Zanthoxylum nitidum* |
| *Commelina obliqua* | *Momordica subangulata* | *Zanthoxylum oxyphyllum* |
| *Commelina paludosa* | *Monochoria hastata* | *Zanthoxylum rhetusa* |
| *Commiphora caudata* | *Monochoria vaginalis* | *Zehneria scabra* |
| *Convolvulus arvensis* | *Morchella esculenta* | *Zingiber chrysanthum* |
| *Corallocarpus epigaeus* | *Morinda citrifolia* | *Zingiber montanum* |
| *Corchorus aestuans* | *Moringa concanensis* | *Zingiber zerumbet* |
| *Cordia dichotoma* | *Moringa oleifera* | *Zizania latifolia* |
| *Cordia monoica* | *Morus alba* | *Ziziphus abyssinica* |
| *Cordia myxa* | *Morus australis* | *Ziziphus jujuba* |
| *Cordia sinensis* | *Morus macroura* | *Ziziphus nummularia* |
| *Coriaria nepalensis* | *Morus nigra* | *Ziziphus oenopolia* |
| *Cornus capitata* | *Morus serrata* | *Ziziphus oxyphylla* |
| *Cornus macrophylla* | *Mucuna atropurpurea* | *Ziziphus rugosa* |
| *Corylus jacquemontii* | *Mucuna bracteata* | *Ziziphus xylopyrus* |
| *Cotinus coggygria* | *Mucuna monosperma* |  |
| *Cotoneaster microphyllus* | *Mucuna pruriens* |  |
| *Crassocephalum crepidioides* | *Mukia maderaspatana* |  |
| *Craterellus odoratus* | *Murraya paniculata* |  |
| *Crateva nurvala* | *Musa balbisiana* |  |
| *Crateva religiosa* | *Musa velutina* |  |
| *Cressa cretica* | *Mussaenda frondosa* |  |
| *Crinum asiaticum* | *Mussaenda roxburghii* |  |
| *Crinum viviparum* | *Mycetia longifolia* |  |
| *Crotalaria juncea* | *Myrica esculenta* |  |
| *Crotalaria laevigata* | *Nasturtium officinale* |  |
| *Croton tiglium* | *Nastus borbonicus* |  |
| *Cryptocoryne retrospiralis* | *Natsiatum herpeticum* |  |
| *Cucumis dipsaceus* | *Nelumbo nucifera* |  |
| *Cucumis prophetarum* | *Neolamarckia cadamba* |  |
| *Curculigo orchioides* | *Neonauclea purpurea* |  |
| *Curcuma angustifolia* | *Neonotonia wightii* |  |
| *Curcuma aromatica* | *Neptunia oleracea* |  |
| *Curcuma leucorrhiza* | *Nervilia concolor* |  |
| *Curcuma neilgherrensis* | *Nervilia plicata* |  |
| *Curcuma reclinata* | *Nyctanthes arbor-tristis* |  |
| *Curcuma zedoaria* | *Nymphaea alba* |  |
| *Cuscuta reflexa* | *Nymphaea nouchali* |  |
| *Cyamopsis tetragonoloba* | *Nymphaea pubescens* |  |
| *Cyanotis axillaris* | *Nymphaea rubra* |  |
| *Cyanotis tuberosa* | *Nymphoides hydrophylla* |  |
| *Cyanthillium cinereum* | *Nymphoides indica* |  |
| *Cyathea gigantea* | *Nymphoides* *peltata* |  |
| *Cyathocalyx martabanicus* | *Ochlandra wightii* |  |
| *Cycas circinalis* | *Ocimum americanum* |  |
| *Cycas pectinata* | *Ocimum basilicum* |  |
| *Cymbopogon citratus* | *Ocimum gratissimum* |  |
| *Cymbopogon distans* | *Oenanthe javanica* |  |
| *Cymbopogon martini* | *Olax acuminata* |  |
| *Cyperus esculentus* | *Olax psittacorum* |  |
| *Cyperus rotundus* | *Oldenlandia auricularia* |  |
| *Cyphostemma auriculatum* | *Oldenlandia diffusa* |  |
| *Dactyloctenium aegyptium* | *Olea ferruginea* |  |
| *Dalbergia pinnata* | *Onosma* *hispida* |  |
| *Dalbergia rimosa* | *Ophioglossum reticulatum* |  |
| *Dalbergia sericea* | *Ophiopogon intermedius* |  |
| *Dalbergia stipulacea* | *Opuntia dillenii* |  |
| *Dalbergia volubilis* | *Opuntia elatior* |  |
| *Debregeasia longifolia* | *Opuntia ficus-indica* |  |
| *Debregeasia saeneb* | *Opuntia monacantha* |  |
| *Decalepis hamiltonii* | *Opuntia stricta* |  |
| *Deeringia amaranthoides* | *Oreocnide frutescens* |  |
| *Delonix regia* | *Origanum* *vulgare* |  |
| *Dendrocalamus giganteus* | *Orobanche* *alba* |  |
| *Dendrocalamus hamiltonii* | *Oroxylum indicum* |  |
| *Dendrocalamus hookeri* | *Oryza meyeriana* |  |
| *Dendrocalamus longispathus* | *Oryza rufipogon* |  |
| *Dendrocalamus membranaceus* | *Osbeckia crinita* |  |
| *Dendrocalamus sikkimensis* | *Osbeckia stellata* |  |
| *Dendrocalamus strictus* | *Osmanthus fragrans* |  |
| *Dendrocnide sinuata* | *Osyris lanceolata* |  |
| *Dendrophthoe falcata* | *Ottelia alismoides* |  |
| *Derris elliptica* | *Oxalis* acetosella |  |
| *Desmodium oojeinense* | *Oxalis articulata* |  |
| *Digera muricata* | *Oxalis corniculata* |  |
| *Dillenia aurea* | *Oxalis debilis* |  |
| *Dillenia indica* | *Oxalis latifolia* |  |
| *Dillenia pentagyna* | *Oxyria digyna* |  |
| *Dillenia scabrella* | *Pachygone ovata* |  |
| *Dimocarpus longan* | *Pachyrhizus erosus* |  |
| *Dioscorea alata* | *Paederia foetida* |  |
| *Dioscorea belophylla* | *Paeonia emodi* |  |
| *Dioscorea bulbifera* | *Pandanus furcatus* |  |
| *Dioscorea cayennensis* | *Pandanus odorifer* |  |
| *Dioscorea decipiens* | *Papaver dubium* |  |
| *Dioscorea deltoidea* | *Paralemanea grandis* |  |
| *Dioscorea esculenta* | *Parietaria debilis* |  |
| *Dioscorea glabra* | *Parkia timoriana* |  |
| *Dioscorea hamiltonii* | *Parkinsonia aculeata* |  |
| *Dioscorea hispida* | *Parthenocissus semicordata* |  |
| *Dioscorea intermedia* | *Passiflora edulis* |  |
| *Dioscorea kalkapershadii* | *Passiflora foetida* |  |
| *Dioscorea melanophyma* | *Passiflora mollissima* |  |
| *Dioscorea oppositifolia* | *Pavetta indica* |  |
| *Dioscorea pentaphylla* | *Pavetta subcapitata* |  |
| *Dioscorea pubera* | *Pavonia cancellata* |  |
| *Dioscorea tomentosa* | *Pecteilis gigantea* |  |
| *Dioscorea trinervia* | *Pegia nitida* |  |
| *Dioscorea villosa* | *Pelatantheria insectifera* |  |
| *Dioscorea wallichii* | *Pentatropis capensis* |  |
| *Dioscorea wightii* | *Peperomia pellucida* |  |
| *Diospyros bourdillonii* | *Pereskia bleo* |  |
| *Diospyros ebenum* | *Pergularia daemia* |  |
| *Diospyros exsculpta* | *Perilla frutescens* |  |
| *Diospyros foliolosa* | *Persea americana* |  |
| *Diospyros kaki* | *Persicaria* *alpina* |  |
| *Diospyros lanceifolia* | *Persicaria amplexicaulis* |  |
| *Diospyros* *lotus* | *Persicaria barbata* |  |
| *Diospyros malabarica* | *Persicaria chinensis* |  |
